# Supplementary material for: Clemastine and metformin extend the window of NMDA receptor surface expression in ageing oligodendrocyte precursor cells
Source: PubMed Central journal article supplement (PMC10876931; doi:10.1038/s41598-024-53615-x), 2024-02-19
Supplement: 41598_2024_53615_MOESM1_ESM.pdf [file 41598_2024_53615_MOESM1_ESM.pdf]

**Clemastine and metformin extend the window of NMDA receptor surface expression in ageing oligodendrocyte precursor cells**

Yasmine Kamen<sup>1\*</sup>, Kimberley Anne Evans<sup>1</sup>, Sergey Sitnikov<sup>1</sup>, Sonia Olivia Spitzer<sup>1</sup>, Omar de Faria Jr.<sup>1</sup>, Mert Yucel<sup>1</sup>, and Ragnhildur Thóra Káradóttir<sup>1,2\*</sup>

1. Wellcome – Medical Research Council Cambridge Stem Cell Institute & Department of Veterinary Medicine, University of Cambridge, Cambridge, United Kingdom
2. Department of Physiology, BioMedical Center, Faculty of Medicine, University of Iceland, Reykjavik, Iceland

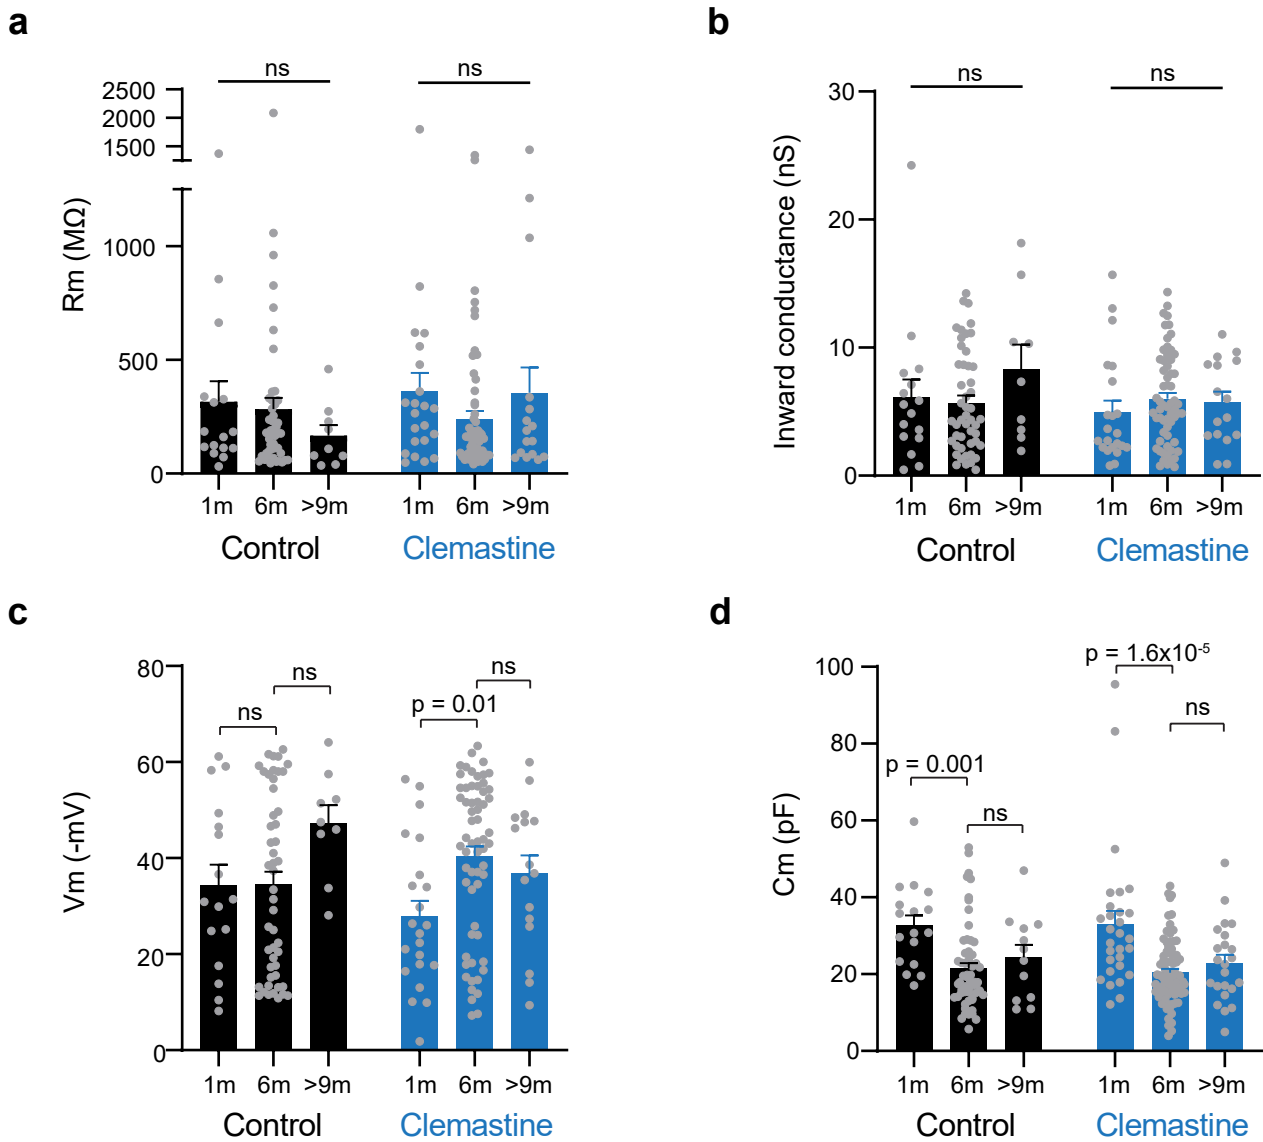

### Supplementary Figure S1. Clemastine does not alter OPC passive membrane properties

**a** Membrane resistance ( $R_m$ ) does not differ with age or clemastine treatment in adult cortical OPCs. A two-way ANOVA was run to compare control and clemastine-treated OPCs across ages: condition main effect,  $p=0.3$ ; age main effect,  $p=0.5$ ; interaction,  $p=0.3$ . 1m control:  $n=16$ , 6m control:  $n=49$ , 9m control:  $n=9$ , 1m clemastine:  $n=22$ , 6m clemastine:  $n=61$ , 9m clemastine:  $n=16$ . p-values on the bar graph are from the condition and age main effects. **b** Inward rectifying  $K^+$  conductance (inward conductance) does not differ with age or clemastine treatment in adult cortical OPCs. A two-way ANOVA was run to compare control and clemastine-treated OPCs across ages: condition main effect,  $p=0.1$ ; age main effect,  $p=0.4$ ; interaction,  $p=0.3$ ; 1m control:  $n=16$ , 6m control:  $n=49$ , 9m control:  $n=9$ ; 1m clemastine:  $n=22$ , 6m clemastine:  $n=61$ ; 9m clemastine:  $n=16$ . p-values on the bar graphs are from condition and age main effects. **c** Resting membrane potential ( $V_m$ ) was more negative in 6m clemastine-treated mice. In contrast, in control mice,  $V_m$  did not change with age. A two-way ANOVA was run to compare control and clemastine-treated OPCs across ages: condition main effect,  $p=0.2$ ; age main effect,  $p=0.04$ ; interaction,  $p=0.04$ , indicating no difference in  $V_m$  between conditions, but a difference in how  $V_m$  changes with age with clemastine treatment. 1m control:  $n=16$ , 6m control:  $n=49$ , 9m control:  $n=9$ ; 1m clemastine:  $n=22$ , 6m clemastine:  $n=61$ ; 9m clemastine:  $n=16$ . p-values on the bar graph are from Holm-Bonferroni post-hoc tests. **d** Membrane capacitance ( $C_m$ ), a proxy for cell surface area, decreases with age in adult cortical OPCs in both control and clemastine-treated mice. A two-way ANOVA was run to compare control and clemastine-treated OPCs across ages: condition main effect,  $p=0.7$ ; age main effect,  $p=6.5 \times 10^{-8}$ ; interaction,  $p=0.9$ . 1m control:  $n=17$ , 6m control:  $n=60$ , 9m control:  $n=12$ ; 1m clemastine:  $n=29$ , 6m clemastine:  $n=77$ ; 9m clemastine:  $n=23$ . p-values on the bar graph are from Holm-Bonferroni post-hoc tests. Data are shown as mean  $\pm$  SEM, with grey dots indicating individual recorded cells.

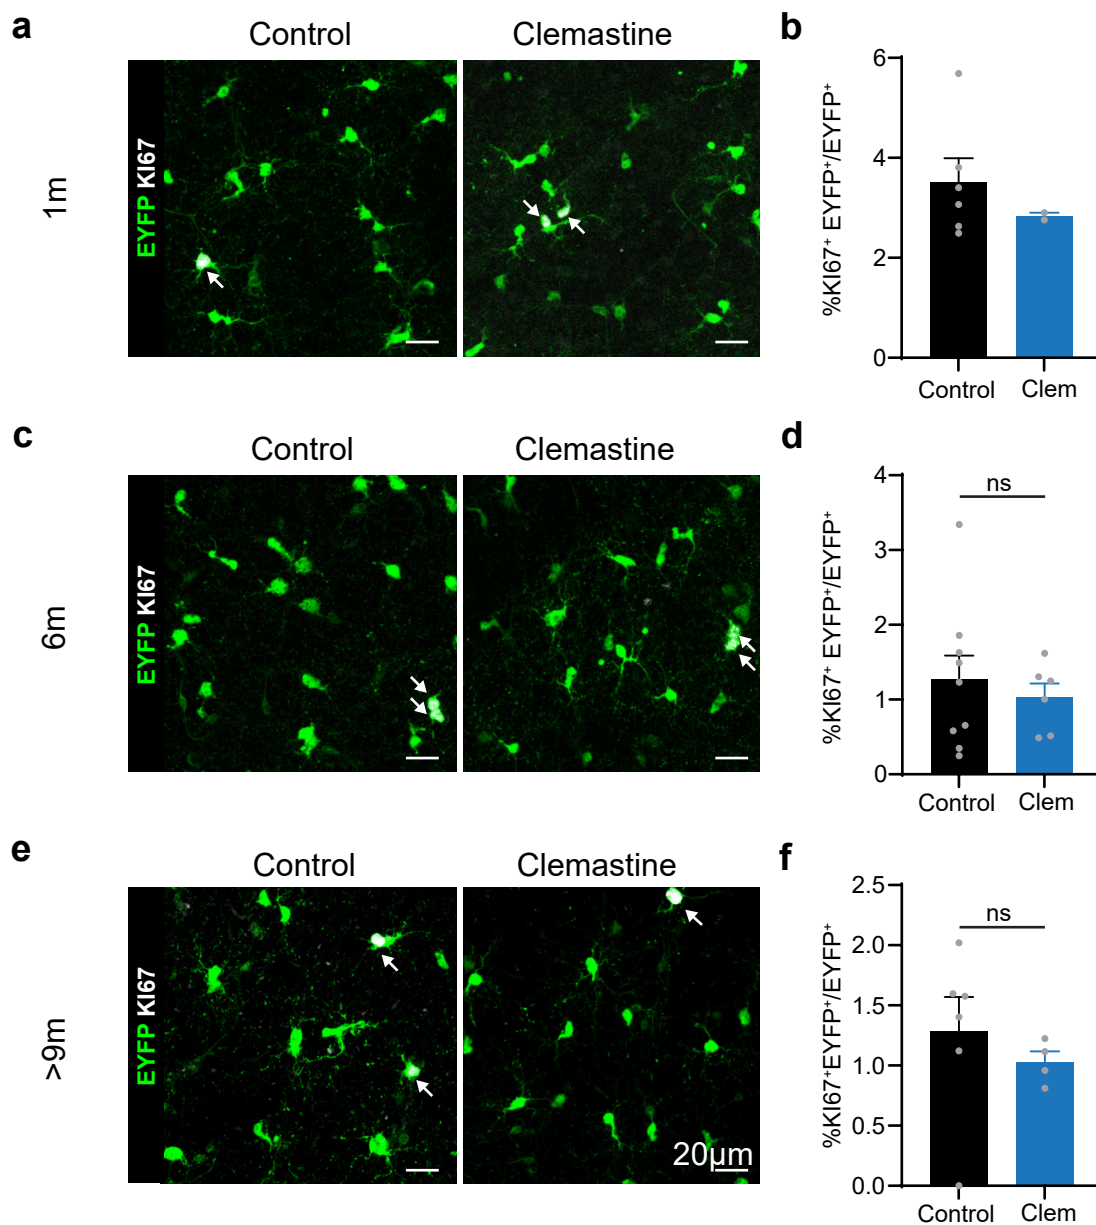

### Supplementary Figure S2 Clemastine does not alter OPC proliferation

**a** Cortical slices from 1m NG2-EYFP mice were immunolabelled against EYFP and KI67, a proliferation marker. EYFP<sup>+</sup>KI67<sup>+</sup> cells are indicated with white arrows. **b** 7-10 days clemastine treatment is unlikely to alter OPC proliferation in 1m mice, but this was not tested statistically due to a small sample size: control: n=6; clemastine: n=2. **c** Cortical slices from 6m NG2-EYFP mice were immunolabelled against EYFP and KI67. EYFP<sup>+</sup>KI67<sup>+</sup> cells are indicated with white arrows. **d** 7-10 days clemastine treatment did not alter OPC proliferation in 6m mice. p=0.6, unpaired two-tailed t-test; control: n=9, clemastine: n=6. **e** Cortical slices from >9m NG2-EYFP mice were immunolabelled against EYFP and KI67. EYFP<sup>+</sup>KI67<sup>+</sup> cells are indicated with white arrows. **f** 7-10 days clemastine treatment did not alter OPC proliferation in >9m mice. p=0.5, unpaired two-tailed t-test; control: n=6, clemastine: n=4. Data are shown as mean ± SEM, with grey dots indicating individual animals.

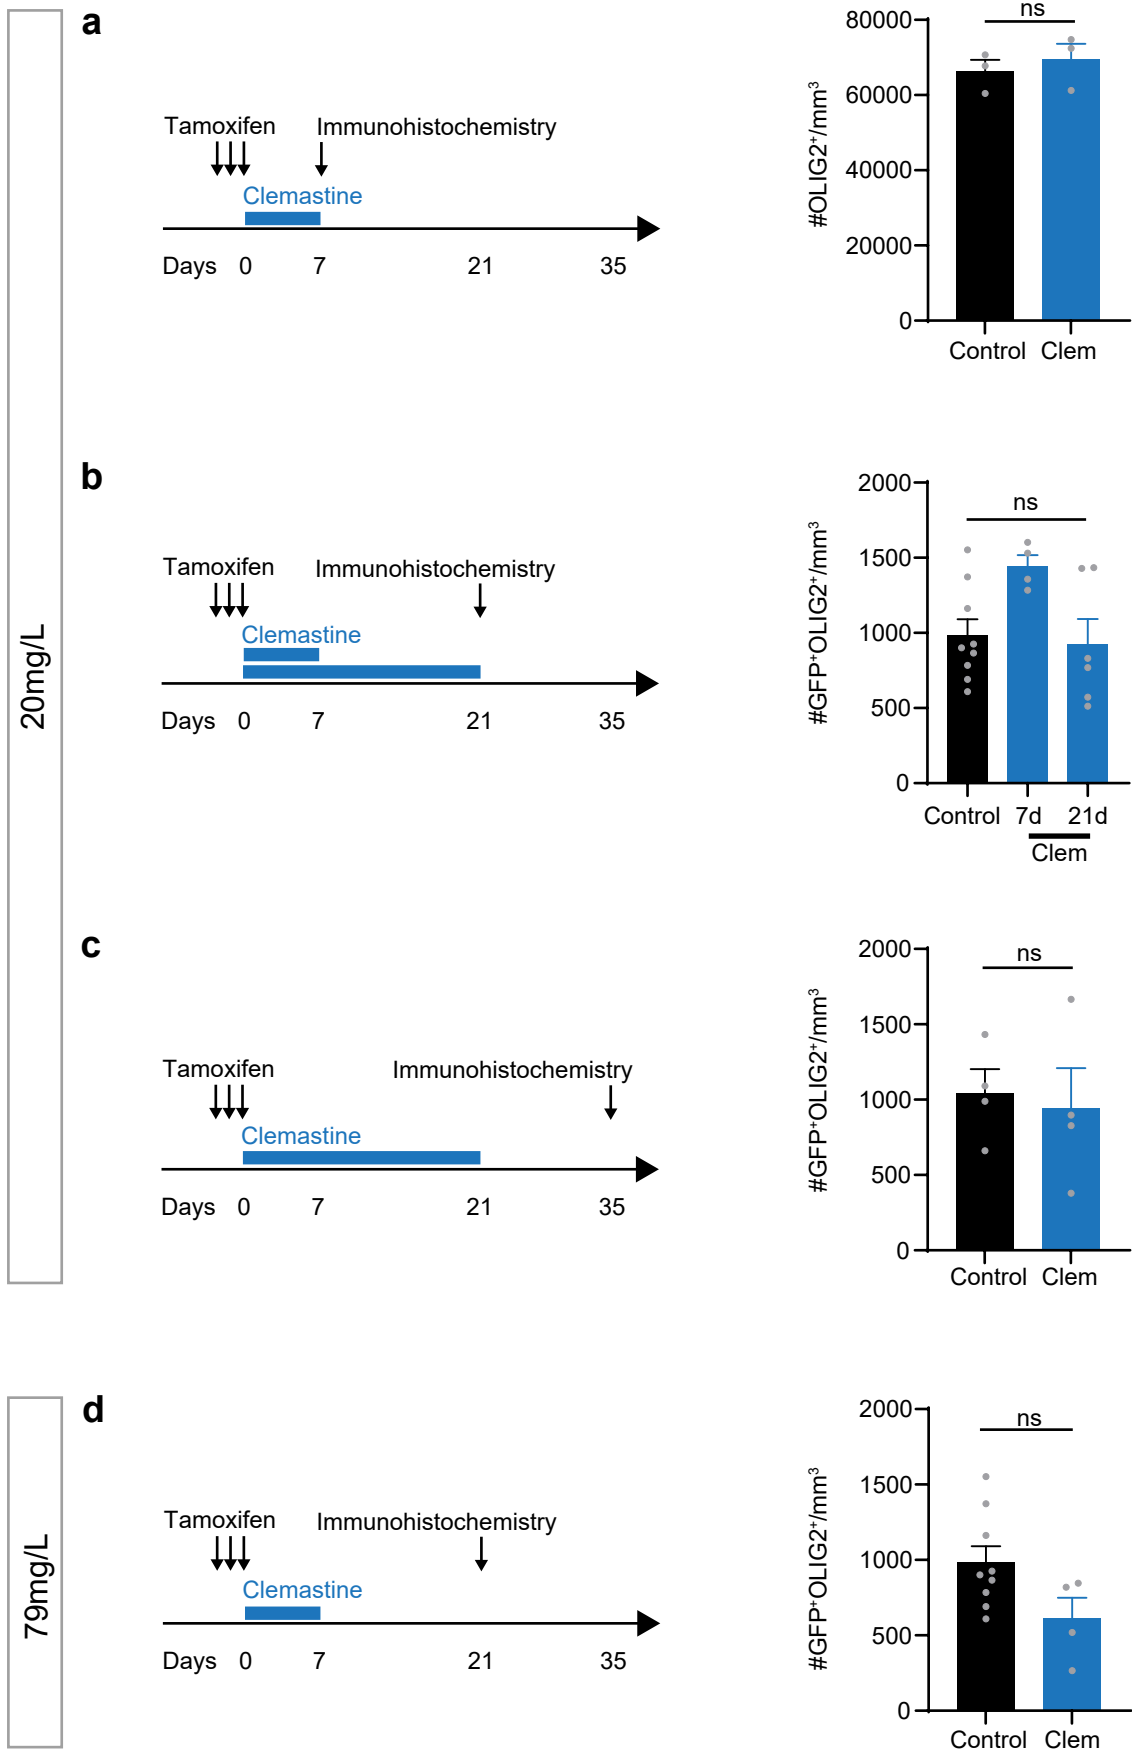

**Supplementary Figure S3. Different clemastine administration protocols and doses do not promote differentiation**

**Supplementary Figure S3. Different clemastine administration protocols and doses do not promote differentiation**

**a** Following 3 days of tamoxifen administration to induce Cre activity, 6m  $Pdgfra^{CreER^{T2}}$ :Tau-mGFP mice were given 20mg/L clemastine for 7 days in their drinking water before perfusion-fixation for immunohistochemical analysis. 7 days clemastine treatment did not alter the number of oligodendrocyte lineage cells (OLIG2<sup>+</sup>).  $p=0.6$ , unpaired two-tailed t-test;  $n=3$  for both conditions. **b** Following 3 days of tamoxifen administration to induce Cre activity, 6m  $Pdgfra^{CreER^{T2}}$ :Tau-mGFP mice were given 20mg/L clemastine for 7 or 21 days in their drinking water. All mice were perfused-fixed after 21 days for immunohistochemical analysis. Clemastine treatment did not alter the number of newly differentiated oligodendrocytes in the cingulate cortex.  $p=0.054$ , one-way ANOVA, control:  $n=9$ , 7 days clemastine:  $n=4$ , 21 days clemastine:  $n=6$ . **c** Following 3 days of tamoxifen administration to induce Cre activity, 6m  $Pdgfra^{CreER^{T2}}$ :Tau-mGFP mice were given 20mg/L clemastine for 21 days in their drinking water before perfusion-fixation at 35 days for immunohistochemical analysis. This longer treatment did not alter differentiation in the cingulate cortex.  $p=0.8$ , unpaired two-tailed t-test;  $n=4$  for both conditions. **d** Following 3 days of tamoxifen administration to induce Cre activity, 6m  $Pdgfra^{CreER^{T2}}$ :Tau-mGFP mice were given 79mg/L clemastine for 7 days in their drinking water before perfusion-fixation after 21 days for immunohistochemical analysis. Differentiation in clemastine-treated animals did not differ from control animals in the cingulate cortex.  $p=0.07$ , unpaired two-tailed t-test; control:  $n=9$ , clemastine:  $n=4$ . Data are shown as mean  $\pm$ SEM, with grey dots indicating individual animals.

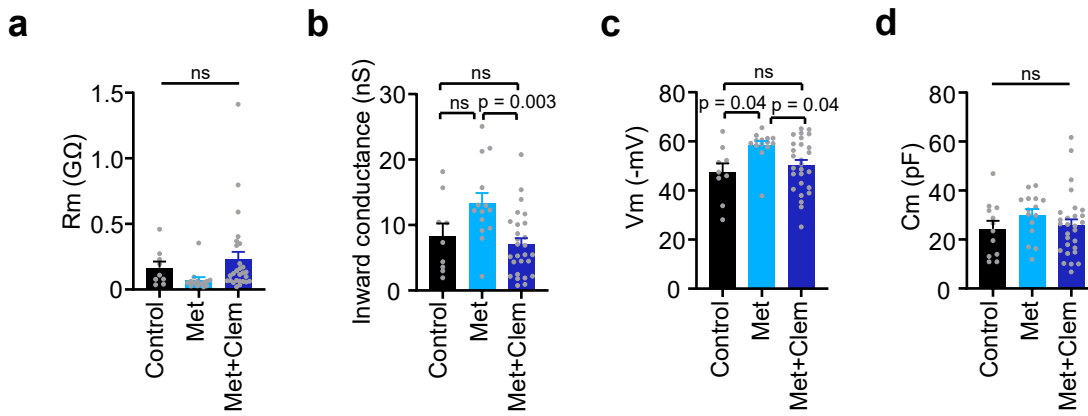

### Supplementary Figure S4. Metformin alters passive membrane properties in OPCs

**a** Membrane resistance ( $R_m$ ) does not differ with metformin or metformin+clemastine treatment in adult cortical OPCs.  $p=0.1$ , one-way ANOVA, control:  $n=9$ , metformin:  $n=14$ , metformin+clemastine:  $n=27$ . **b** Inward rectifying  $K^+$  conductance (inward conductance) was increased by metformin treatment alone, but not by metformin+clemastine treatment.  $p=0.004$ , one-way ANOVA, control:  $n=9$ , metformin:  $n=14$ , metformin+clemastine:  $n=27$ .  $p$  values on the bar graph are from Holm-Bonferroni post-hoc tests. **c** Metformin treatment alone hyperpolarized OPCs, but metformin+clemastine administration did not alter resting membrane potential ( $V_m$ ).  $p=0.007$ , one-way ANOVA, control:  $n=9$ , metformin:  $n=14$ , metformin+clemastine:  $n=27$ .  $p$  values on the bar graph are from Holm-Bonferroni post-hoc tests. **d** Membrane capacitance ( $C_m$ ), a proxy for cell surface area, did not differ between conditions.  $p=0.4$ , one-way ANOVA, control:  $n=12$ , metformin:  $n=15$ ; metformin+clemastine:  $n=28$ .
